# Supplementary material for: Treatment Regimens for Transplant-Ineligible Patients With Newly Diagnosed Multiple Myeloma: A Systematic Literature Review and Network Meta-analysis
Source: Springer Nature journal article supplement (doi:10.1007/s12325-022-02083-8), 2022-03-05
Supplement: MOESM1 [file 12325_2022_2083_MOESM1_ESM.pdf]

## SUPPLEMENTARY MATERIAL

---

### **Treatment Regimens for Transplant-ineligible Patients with Newly Diagnosed Multiple Myeloma: A Systematic Literature Review and Network Meta-analysis**

Thierry Facon • Jesús San-Miguel • Meletios A. Dimopoulos • Maria-Victoria Mateos • Michele Cavo • Sophie van Beekhuizen • Zijiao Yuan • João Mendes • Annette Lam • Jianming He • Eric Ammann • Shaji Kumar

T. Facon: Department of Haematology, Lille University Hospital, Lille, France

J. San-Miguel: Clínica Universidad de Navarra-CIMA, IDISNA, CIBERONC Pamplona, Spain

M. A. Dimopoulos: National and Kapodistrian University of Athens, Athens, Greece

M.-V. Mateos: University Hospital of Salamanca/IBSAL, Salamanca, Spain

M. Cavo: IRCCS Azienda Ospedaliero-Universitaria di Bologna, Seràgnoli Institute of Hematology, Bologna University School of Medicine, Bologna, Italy

S. van Beekhuizen and Z. Yuan: Ingress Health, Rotterdam, Netherlands

J. Mendes: Janssen Cilag, Porto Salvo, Portugal

A. Lam, J. He, and E. Ammann: Janssen Global Services, 700 US Route 202 South, Raritan, NJ, USA, 08869

S. Kumar: Mayo Clinic Rochester, Rochester, MN, USA

**Corresponding author:** Eric Ammann

Janssen Global Services,

700 US Route 202 South,

Raritan, NJ, USA, 08869

e-mail: eammann@its.jnj.com

## CONTENTS

|                                                                                                |   |
|------------------------------------------------------------------------------------------------|---|
| <b>Table S1</b> Eligibility criteria used in the systematic literature review.....             | 3 |
| <b>Table S2</b> PFS and OS by age from the SWOG S0777 and ENDURANCE trials.....                | 4 |
| <b>Table S3</b> Overview of identified studies and their patient baseline characteristics..... | 5 |

**Supplementary Table 1** Eligibility criteria used in the systematic literature review

| <b>Criteria</b>              | <b>Inclusion criteria</b>                                                                                             | <b>Exclusion criteria</b>                                                            | <b>Brief rationale</b>                                                                                                                                                              |
|------------------------------|-----------------------------------------------------------------------------------------------------------------------|--------------------------------------------------------------------------------------|-------------------------------------------------------------------------------------------------------------------------------------------------------------------------------------|
| <b>Population</b>            | Patients with newly diagnosed multiple myeloma ineligible for autologous cell transplant (ASCT)                       | Indications other than MM; transplant-eligible population; relapsed/refractory MM    | Only studies on newly diagnosed MM patients who are ASCT-ineligible are relevant for the purposes of this submission                                                                |
| <b>Outcomes</b>              | Clinical outcomes, including OS, PFS, response (overall response, very good partial response, complete response etc.) | HRQoL, economic evaluation, other clinical outcomes, e.g. PFS2 etc.                  | Only studies that reported listed clinical outcomes, which will be used for indirect comparison, are regarded as relevant                                                           |
| <b>Study design</b>          | Randomised controlled trials                                                                                          | Observational studies, single-arm trials, pharmacokinetic or pharmacodynamic studies | The study designs specified as eligible for inclusion were those considered most likely to report relevant data for this submission                                                 |
| <b>Publication type</b>      | N/A                                                                                                                   | Editorials, reviews, letters                                                         |                                                                                                                                                                                     |
| <b>Language restrictions</b> | English                                                                                                               | Any other language                                                                   | The majority of the research in the field is published in English                                                                                                                   |
| <b>Time</b>                  | No time restriction for full-text publication; conference abstracts from 2018 onwards                                 | N/A                                                                                  | Conference abstracts published 1 year ahead of search were included in Embase database. Manual search was conducted to ensure the latest publications were identified in the review |

HRQoL, health-related quality of life; OS, overall survival; MM, multiple myeloma; N/A, not applicable; PFS, progression-free survival; PFS2, time from initial study randomization to second disease progression or death from any cause.

**Supplementary Table 2** PFS and OS by age from the SWOG S0777 and ENDURANCE

trials

| <b>Trial</b>              | <b>Age subgroup</b> | <b>PFS HR (95% CI)</b> | <b>OS HR (95% CI)</b> |
|---------------------------|---------------------|------------------------|-----------------------|
| SWOG S0777<br>(VRd vs Rd) | ≥65 years           | 0.77 (0.55–1.08)       | 0.77 (0.52–1.14)      |
|                           | <65 years           | 0.68 (0.50–0.93)       | 0.64 (0.42–0.97)      |
| ENDURANCE<br>(KRd vs VRd) | ≥65 years           | 1.18 (0.85–1.63)       | Not reported          |
|                           | <65 years           | 0.92 (0.66–1.27)       | Not reported          |

CI, confidence interval; HR, hazard ratio; KRd, carfilzomib/lenalidomide/dexamethasone;

OS, overall survival; PFS, progression-free survival; Rd, lenalidomide/dexamethasone;

VRd, bortezomib/lenalidomide/dexamethasone.

**Supplementary Table 3** Overview of identified studies and their patient baseline characteristics

| <b>Trials</b>             | <b>Location</b>                                               | <b>Treatment arms</b> | <b>N</b> | <b>Median Age (years)</b> | <b>Female (%)</b> | <b>MM type-IgG (%)</b> | <b>ISS-stage III (%)</b> | <b>High-risk cytogenetic abnormality (%)<sup>a</sup></b> | <b>ECOG <math>\geq</math>2 (%)</b> |
|---------------------------|---------------------------------------------------------------|-----------------------|----------|---------------------------|-------------------|------------------------|--------------------------|----------------------------------------------------------|------------------------------------|
| UPFRONT [1,2]             | US                                                            | VD                    | 168      | 74.5                      | 40                | 62                     | 33                       |                                                          |                                    |
|                           |                                                               | VTD                   | 167      | 73                        | 58                | 58                     | 32                       |                                                          |                                    |
|                           |                                                               | VMP                   | 167      | 72                        | 46                | 62                     | 36                       |                                                          |                                    |
| FIRST trial [3-14]        | Multicountry; US, Canada, Asia Pacific, Europe                | Rd continuous         | 535      | 73                        | 45                | 62                     | 40                       | 17                                                       | 22                                 |
|                           |                                                               | Rd18                  | 541      | 73                        | 50                | 61                     | 40                       | 20                                                       | 21                                 |
|                           |                                                               | MPT                   | 547      | 73                        | 48                | 64                     | 41                       | 19                                                       | 20                                 |
| Palumbo et al. [15-21]    | Italy; Europe                                                 | VMPT-VT <sup>b</sup>  | 254      | 71                        | 49                |                        | 19                       |                                                          |                                    |
|                           |                                                               | VMP <sup>b</sup>      | 257      | 71                        | 53                |                        | 22                       |                                                          |                                    |
|                           |                                                               | VMP-Lite <sup>c</sup> | 191      | 71                        |                   |                        |                          |                                                          |                                    |
|                           |                                                               | VMP <sup>d</sup>      | 66       | 72                        |                   |                        |                          |                                                          |                                    |
| San-Miguel et al. [22,23] | Multicountry; US, Europe, Asia Pacific                        | VMP-S                 | 52       | 71                        |                   | 42                     | 54                       | 17                                                       | 33                                 |
|                           |                                                               | VMP                   | 54       | 70                        |                   | 68.5                   | 54                       | 10                                                       | 24                                 |
| VISTA trial [24-29]       | Multicountry; US, Canada, Europe, Latin America, Asia Pacific | VMP                   | 344      | 71                        | 49                | 64                     | 35                       |                                                          |                                    |
|                           |                                                               | MP                    | 338      | 71                        | 51                | 62                     | 34                       |                                                          |                                    |
| GEM05 [30-32]             | Spain; Europe                                                 | VMP-Lite <sup>e</sup> | 130      | 73                        | 47                | 62                     | 30                       | 14                                                       |                                    |
|                           |                                                               | VTP                   | 130      | 73                        | 53                | 55                     | 37                       | 7                                                        |                                    |
|                           |                                                               | VT maintenance        | 91       | 71                        | 47                | 62                     | 29                       | 17                                                       |                                    |
|                           |                                                               | VP maintenance        | 87       | 72                        | 53                | 55                     | 30                       | 15                                                       |                                    |
| MM-015 [33-38]            | Multicountry; Asia Pacific, Europe                            | MPR-R                 | 152      | 71                        | 53.3              |                        | 48.7                     |                                                          |                                    |
|                           |                                                               | MPR                   | 153      | 71                        | 46.4              |                        | 48.4                     |                                                          |                                    |
|                           |                                                               | MP                    | 154      | 72                        | 51.3              |                        | 50.6                     |                                                          |                                    |
| Sacchi et al. [39]        | Italy; Europe                                                 | MP                    | 54       | 79                        | 52                | 63                     | 30                       |                                                          | 9                                  |
|                           |                                                               | MPT                   | 64       | 76                        | 55                | 73                     | 22                       |                                                          | 12                                 |

| Trials                   | Location                                   | Treatment arms                    | N   | Median Age (years) | Female (%) | MM type-IgG (%) | ISS-stage III (%) | High-risk cytogenetic abnormality (%) <sup>a</sup> | ECOG ≥2 (%) |
|--------------------------|--------------------------------------------|-----------------------------------|-----|--------------------|------------|-----------------|-------------------|----------------------------------------------------|-------------|
| MRC Myeloma IX [40]      | Multicountry; Asia Pacific, Africa, Europe | MP                                | 423 | 73                 | 45.4       | 60.8            | 39                | 41.9                                               |             |
|                          |                                            | CTD                               | 426 | 73                 | 43.2       | 58.2            | 39.4              | 42.7                                               |             |
| TMSG study [41]          | Turkey; Europe                             | MPT-T                             | 58  | 69                 | 39.7       | 83              |                   |                                                    |             |
|                          |                                            | MP                                | 57  | 72                 | 52.6       | 71.4            |                   |                                                    |             |
| HOVON 49 [42]            | Netherlands; Europe                        | MP                                | 168 | 73                 | 45.2       | 61.3            | 17.3              |                                                    |             |
|                          |                                            | MPT-T                             | 165 | 72                 | 43         | 58.8            | 19.4              |                                                    |             |
| NMSG [43]                | Multicountry; Europe                       | MPT-T                             | 182 | 74.6               | 49         |                 | 36                |                                                    |             |
|                          |                                            | MP                                | 175 | 74.1               | 39         |                 | 30                |                                                    |             |
| IFM 01/01 [44]           | Multicountry; Europe                       | MP                                | 116 | 78.5               | 47         |                 | 30                |                                                    |             |
|                          |                                            | MPT                               | 113 |                    | 62         |                 | 35                |                                                    |             |
| GIMEMA [45,46]           | Italy; Europe                              | MPT-T                             | 167 | 72                 |            | 65              | 29                |                                                    |             |
|                          |                                            | MP                                | 164 | 72                 |            | 63              | 29                |                                                    |             |
| Ludwig et al. [47]       | Multicountry; Europe                       | VMC(P) with conv.(P) <sup>f</sup> | 144 | 66.5               | 54         | 63              | 67                |                                                    |             |
|                          |                                            | VMCP with cont.(P) <sup>g</sup>   | 148 | 67.5               | 49         | 62              | 68                |                                                    |             |
| HOVON87/NMSG18 [48-50]   | Multicountry; Europe                       | MPT-T                             | 318 | 72                 | 49         | 64              | 26                |                                                    |             |
|                          |                                            | MPR-R                             | 319 | 73                 | 42         | 63              | 26                |                                                    |             |
| IFM 95-01 [51]           | Multicountry; Europe                       | MP                                | 122 | 70                 | 43         | 58              |                   |                                                    |             |
|                          |                                            | M-DEX                             | 118 | 69                 | 53         | 60              |                   |                                                    |             |
|                          |                                            | DEX                               | 127 | 70                 | 50         | 65              |                   |                                                    |             |
|                          |                                            | DEX-IFN                           | 121 | 69                 | 50         | 57              |                   |                                                    |             |
| Magarotto et al. [52-57] | Multicountry; Europe                       | MPR                               | 218 | 74                 | 50         |                 | 27                | 17                                                 |             |
|                          |                                            | CPR                               | 222 | 73                 | 52         |                 | 27                | 22                                                 |             |
|                          |                                            | Rd-9                              | 222 | 74                 | 51         |                 | 27                | 25                                                 |             |
|                          |                                            | RP maintenance                    | 198 | 73                 | 47         |                 | 23                | 19                                                 |             |
|                          |                                            | R maintenance                     | 204 | 73                 | 58         |                 | 23                | 18                                                 |             |
| Hungria et al. [58]      | Multicountry; Latin America                | MPT                               | 32  | 72.2               | 53.1       | 51.7            | 46.7              |                                                    | 53.4        |
|                          |                                            | CTD                               | 32  | 70                 | 65.6       | 55.2            | 41.9              |                                                    | 50.4        |
|                          |                                            | TD                                | 18  | 71.6               | 44.4       | 55.6            | 27.8              |                                                    | 44.4        |
| GEM10 [59,60]            | Spain; Europe                              | Seq. VMP-Lite <sup>h+</sup>       | 118 | 75                 |            | 44              | 30                | 16                                                 |             |
|                          |                                            | Rd                                | 115 | 73                 |            | 47              | 25                | 11                                                 |             |

| Trials                        | Location                                                         | Treatment arms                    | N   | Median Age (years) | Female (%) | MM type-IgG (%) | ISS-stage III (%) | High-risk cytogenetic abnormality (%) <sup>a</sup> | ECOG ≥2 (%) |
|-------------------------------|------------------------------------------------------------------|-----------------------------------|-----|--------------------|------------|-----------------|-------------------|----------------------------------------------------|-------------|
|                               |                                                                  | Alt. VMP-Lite <sup>h+</sup><br>Rd |     |                    |            |                 |                   |                                                    |             |
| E1A06 [61,62]                 | Multicountry; US, Asia Pacific                                   | MPT-T                             | 154 | 75.8               | 44.2       | 71.3            | 32.2              |                                                    | 18.8        |
|                               |                                                                  | MPR-R                             | 152 | 76.6               | 46.7       | 72.6            | 30.3              |                                                    | 19.1        |
| Song et al. [63] <sup>i</sup> | Korea; Asia Pacific                                              | MPT                               | 74  | 69                 | 45.9       | 47.3            | 52.7              |                                                    |             |
|                               |                                                                  | CTD                               | 83  | 69                 | 39.8       | 51.8            | 55.4              |                                                    |             |
| Ludwig et al. [64]            | Multicountry; Europe                                             | TD                                | 145 | 72                 | 49         | 62.7            |                   |                                                    |             |
|                               |                                                                  | MP                                | 143 | 72                 | 51         | 65.7            |                   |                                                    |             |
| IFM 99-06 [65] <sup>j</sup>   | Multicountry; Europe                                             | MP                                | 196 |                    | 44         |                 | 30                |                                                    |             |
|                               |                                                                  | MPT                               | 125 |                    | 50         |                 | 29                |                                                    |             |
| Dimopoulos et al. [66-69]     | Multicountry; Asia Pacific, Europe, US                           | ICD-300                           | 36  | 72.5               | 58         | 58              |                   |                                                    | 17          |
|                               |                                                                  | ICD-400                           | 34  | 75.5               | 47         | 53              |                   |                                                    | 21          |
| Takezako et al. [70,71]       | Japan; Asia Pacific                                              | ERd                               | 40  | 72                 | 57.5       | 78              | 20                | 3                                                  |             |
|                               |                                                                  | Rd continuous                     | 42  | 73                 | 47.6       | 69              | 21                | 0                                                  |             |
| CLARION trial [72,73]         | Multicountry; Asia Pacific, Europe, Latin America, North America | VMP                               | 477 | 72                 | 49.9       |                 | 37.7              | 14                                                 | 21.2        |
|                               |                                                                  | CMP                               | 478 | 72                 | 49.2       |                 | 38.1              | 11.3                                               | 18.6        |
| KEYNOTE 185 trial [74,75]     | NA                                                               | Pembro-Rd                         | 151 | 74                 | 54         |                 | 29                | 16                                                 | 0           |
|                               |                                                                  | Rd continuous                     | 150 | 74                 | 53         |                 | 21                | 7                                                  | 1           |
| ALCYONE trial [76-82]         | Multicountry; Asia Pacific, Europe, Latin America, North America | D-VMP                             | 350 | 71                 | 54         | 40.9            | 40.6              | 16.9                                               | 25.7        |
|                               |                                                                  | VMP-lite <sup>k</sup>             | 356 |                    | 53         | 39.3            | 36.2              | 14.9                                               | 23.6        |
| IMPROVE MPB-study [83]        | Japan; Asia Pacific                                              | modified PETHEMA-VMP <sup>l</sup> | 45  | 72                 | 46.7       | 62              | 20                |                                                    |             |
|                               |                                                                  | JCOG-VMP <sup>m</sup>             | 46  | 72                 | 37         | 63              | 15                |                                                    |             |
| MAIA [84-87] <sup>n</sup>     | Multicountry; North America, Europe, Asia Pacific                | D-Rd                              | 368 | 73                 | 48.6       | 61.1            | 29.1              | 15                                                 | 17.1        |
|                               |                                                                  | Rd continuous                     | 369 | 74                 | 47.2       | 62.6            | 29.8              | 13.6                                               | 16          |
| RV-MM-PI-0752 [88-90]         | Italy; Europe                                                    | Rd9-R                             | 101 | 75                 |            |                 | 21                | 13                                                 | 11          |

| <b>Trials</b>                   | <b>Location</b>                           | <b>Treatment arms</b>            | <b>N</b>  | <b>Median Age (years)</b> | <b>Female (%)</b> | <b>MM type-IgG (%)</b> | <b>ISS-stage III (%)</b> | <b>High-risk cytogenetic abnormality (%)<sup>a</sup></b> | <b>ECOG ≥2 (%)</b> |
|---------------------------------|-------------------------------------------|----------------------------------|-----------|---------------------------|-------------------|------------------------|--------------------------|----------------------------------------------------------|--------------------|
|                                 |                                           | Rd continuous                    | 98        | 76                        |                   |                        | 26                       | 16                                                       | 10                 |
| SWOG S0777 [91,92] <sup>o</sup> | Multicountry; North America, Asia Pacific | VRd<br>Rd continuous             | 91<br>106 |                           |                   |                        |                          |                                                          |                    |
| Myeloma XI [93-96] <sup>p</sup> | Multicountry; Europe                      | CTDa <sup>q</sup>                | 924       | 74                        | 42                | 63.5                   | 35.9                     | 37.3                                                     |                    |
|                                 |                                           | CRDa <sup>q</sup>                | 926       | 75                        | 44.9              | 62.5                   | 35.2                     | 35.2                                                     |                    |
|                                 |                                           | CVD <sup>r</sup>                 | 106       |                           |                   |                        |                          |                                                          |                    |
|                                 |                                           | No active treatment <sup>t</sup> | 110       |                           |                   |                        |                          |                                                          |                    |
|                                 |                                           | CTDa-R <sup>s</sup>              | 194       | 73.5                      | 40.7              | 64.9                   | 34.5                     | 43.2                                                     |                    |
|                                 |                                           | CTDa <sup>s</sup>                | 150       | 73.5                      | 36                | 56.7                   | 28.7                     | 46                                                       |                    |
| CRDa-R <sup>s</sup>             | 213                                       | 74                               | 42.7      | 63.4                      | 31.5              | 31.7                   |                          |                                                          |                    |
| CRDa <sup>s</sup>               | 166                                       | 73                               | 37.3      | 62.7                      | 28.9              | 43.1                   |                          |                                                          |                    |
| Suzuki et al. [97]              | Japan; Asia Pacific                       | MPT                              | 52        | 78                        | 46.2              | 67.3                   | 23.1                     |                                                          | 13.5               |
|                                 |                                           | MP                               | 51        | 76                        | 51                | 51                     | 23.5                     |                                                          | 7.8                |
| GERMAIN [98]                    | Germany; Europe                           | VMP-R                            | 19        | 73                        | 37                | 53                     | 37                       |                                                          |                    |
|                                 |                                           | VMP-placebo                      | 21        | 76                        | 29                | 48                     | 5                        |                                                          |                    |
| ENDURANCE [99,100]              | Multicountry; North America               | VRd                              | 542       | 64                        | 42                |                        | 26                       | 28                                                       | 11                 |
|                                 |                                           | KRd                              | 545       | 65                        | 40                |                        | 29                       | 28                                                       | 10                 |
| GEM-CLARIDEX [101,102]          | Spain; Europe                             | CRd                              | 143       | 76                        |                   |                        |                          | 15.6                                                     |                    |
|                                 |                                           | Rd                               | 143       |                           |                   |                        |                          |                                                          |                    |
| UNITO-EMN10 [103,104]           | Italy; Europe                             | Id                               | 41        | 74                        |                   |                        |                          |                                                          |                    |
|                                 |                                           | ICd                              | 59        |                           |                   |                        |                          |                                                          |                    |
|                                 |                                           | ITd                              | 60        |                           |                   |                        |                          |                                                          |                    |
|                                 |                                           | IBd                              | 11        |                           |                   |                        |                          |                                                          |                    |
| Кирилл Белоусов et al. [105]    | Russia; Europe                            | VMP                              | 45        |                           |                   |                        |                          |                                                          |                    |
|                                 |                                           | VRP                              | 38        |                           |                   |                        |                          |                                                          |                    |
| AGMT MM-02 [99,106]             | Austria, Germany                          | KTd<br>KRd                       | 87        |                           |                   |                        |                          |                                                          |                    |
| TOURMALINE-MM2 [107]            | Multicountry                              | IRd                              | 351       | 73                        |                   |                        | 16                       |                                                          |                    |
|                                 |                                           | Placebo-Rd                       | 354       | 74                        |                   |                        | 17                       |                                                          |                    |
| HOVON126 [108]                  | Europe                                    | ITd-I                            | 39        | 72                        |                   |                        | 21                       | 18                                                       |                    |
|                                 |                                           | ITd-placebo                      | 39        | 73                        |                   |                        | 28                       | 18                                                       |                    |



| <b>Trials</b>                     | <b>Location</b>                                                             | <b>Treatment arms</b> | <b>N</b>   | <b>Median Age (years)</b> | <b>Female (%)</b> | <b>MM type-IgG (%)</b> | <b>ISS-stage III (%)</b> | <b>High-risk cytogenetic abnormality (%)<sup>a</sup></b> | <b>ECOG <math>\geq</math>2 (%)</b> |
|-----------------------------------|-----------------------------------------------------------------------------|-----------------------|------------|---------------------------|-------------------|------------------------|--------------------------|----------------------------------------------------------|------------------------------------|
| SWOG 1211 [109]                   | US                                                                          | VRd-Elo<br>VRd        | 48<br>52   | 62<br>66                  | 40<br>40          |                        | 31<br>27                 |                                                          |                                    |
| TOURMALINE-MM4 [110] <sup>t</sup> | Multicountry;<br>Africa, Asia,<br>Europe, North<br>America, Asia<br>Pacific | Ixazomib<br>Placebo   | 425<br>281 | 72<br>73                  |                   |                        | 35<br>36                 | 17<br>17                                                 |                                    |

ADL, activity of daily living; ASCT, autologous stem cell transplant; BMP, bortezomib/melphalan/prednisone; BMPS, BMP plus siltuximab; BMPT-VT, bortezomib/melphalan/prednisone/thalidomide followed by maintenance with bortezomib plus thalidomide; CMP, carfilzomib/melphalan/prednisone; cont., continuous; conv., conventional; CPR, cyclophosphamide/prednisone/lenalidomide; CRd, cyclophosphamide/lenalidomide/dexamethasone; CRDa, attenuated cyclophosphamide/lenalidomide/dexamethasone; CTDa, attenuated cyclophosphamide/thalidomide/dexamethasone; CTDa-L/CRDa-L, CTDa/CRDa plus lenalidomide maintenance; DBMP, daratumumab plus BMP; DEX-IFN, dexamethasone-Interferon alpha; DRd, daratumumab plus Rd; ERd, elotuzumab plus Rd; ICd, ixazomib/cyclophosphamide/dexamethasone; IADL, instrumental ADL; Id, ixazomib/dexamethasone; IRd, ixazomib/lenalidomide/dexamethasone; ITd, ixazomib/thalidomide/dexamethasone; ITd-I, ITd plus ixazomib maintenance; IVD, ixazomib/bortezomib/dexamethasone; JCOG, Japan Clinical Oncology Group; KRd, carfilzomib/lenalidomide/dexamethasone M-DEX, melphalan/dexamethasone; MM, multiple myeloma; MP, melphalan/prednisone; MPR, melphalan/prednisone/lenalidomide; MPR-R, MPR plus lenalidomide

maintenance; MPT, melphalan/prednisone/thalidomide; MPT-T, MPT plus thalidomide maintenance; placebo-Rd, placebo followed with Rd maintenance; Rd, lenalidomide/dexamethasone; NDMM, newly diagnosed MM; Rd 18, lenalidomide/dexamethasone 18 months; Rd 9, lenalidomide/dexamethasone 9 months; Rd 9-R, Rd 9 with lenalidomide maintenance; Rd continuous, lenalidomide/dexamethasone continuous; SLR, systematic literature review; TIE, transplant ineligible; VD, bortezomib/dexamethasone; VMCP, vincristine/melphalan/cyclophosphamide and prednisolone; VMP-S, bortezomib/melphalan/prednisone/siltuximab; VRd, bortezomib/lenalidomide/dexamethasone; VRd-Elo, VRd plus elotuzumab; VTD, bortezomib/thalidomide/dexamethasone.

<sup>a</sup>Defined as translocations (4;14) or (14;16) or deletion 17p in the trials; (gain(1q), t(4;14), 71t(14;20), t(14;16), and del(17p) in MRC Myeloma IX study).

<sup>b</sup>No distinction between patients who received bortezomib with 9 once-weekly cycles/4 twice-weekly and 5 once-weekly cycles.

<sup>c</sup>Subgroup of the VMP arm ( $N = 257$ ), patients who received the modified VMP schedule; 9 once-weekly cycles.

<sup>d</sup>Subgroup of the VMP arm ( $N = 257$ ), patients who received the original VMP schedule; 4 twice-weekly and 5 once-weekly cycles.

<sup>e</sup>Bortezomib twice weekly during cycle 1, once weekly during cycles 2-6.

<sup>f</sup>14 days of prednisolone treatment in the induction phase per cycle.

<sup>g</sup>28 days of prednisolone treatment in the induction phase per cycle.

<sup>h</sup>Bortezomib twice weekly during cycle 1, once weekly during cycles 2–9.

<sup>i</sup>MM patients with renal impairment; outcomes relating to different subgroups of patients (as determined by glomerular filtration rate cut-off levels) per treatment arm were reported, thus outcome variables haven't been presented in this report.

<sup>j</sup>MEL100 arm not reported.

<sup>k</sup>Bortezomib is administered twice weekly at weeks 1, 2, 4, and 5 in cycle 1 followed by once weekly at weeks 1, 2, 4, and 5 in cycles 2 to 9

<sup>l</sup>Bortezomib is administered twice weekly in cycle 1 (6-week cycle) followed by 4 weekly doses in cycles 2 to 9; 5-week cycles.

<sup>m</sup>Bortezomib is administered in 3 weekly doses in cycles 1 to 9; 4-week cycles.

<sup>n</sup>Intermediate-fit NDMM patients, with a total frailty score (age, Charlson Index, ADL and IADL) of 1. To better approximate a real-world older population, patients usually excluded from clinical trials or with abnormal laboratory values could be included in the trial.

<sup>o</sup>Patients without an intent for immediate ASCT were included. A subgroup analysis of patients 65–75 and >75 years old is provided and outcomes of these subgroups are included in this SLR as ASCT-ineligible patients.

<sup>p</sup>Outcomes related to TIE patients are included in this SLR. Patients considered ineligible for transplantation at trial entry were randomly assigned (1:1) to induction with either attenuated CTD or attenuated CRD. Patients with a suboptimal response to induction treatment were randomly assigned (1:1) to cyclophosphamide, bortezomib, and dexamethasone (CVD) or no CVD. Patients completing induction and intensification treatment (where applicable) and eligible were randomly assigned (1:1) to lenalidomide maintenance or observation.

<sup>q</sup>Represents patients who entered the induction randomisation.

<sup>r</sup>Represents patients who entered the maintenance randomisation.

<sup>s</sup>Represents TIE patients who entered the consolidation randomisation.

<sup>t</sup>The TOURMALINE-MM4 trial is designed to compare single-agent ixazomib maintenance to placebo for patients who received a major positive response to initial therapy and have not undergone SCT.

## REFERENCES

1. Niesvizky R, Flinn IW, Rifkin R, Gabrail N, Charu V, Clowney B, et al. Community-Based Phase IIIB Trial of Three UPFRONT Bortezomib-Based Myeloma Regimens. *J Clin Oncol*. 2015;33:3921–29.
2. Niesvizky R, Flinn I, Rifkin RM, Essell J, Gaffar Y, Warr T, et al. Efficacy and Safety Of Three Bortezomib-Based Induction and Maintenance Regimens In Previously Untreated, Transplant-Ineligible Multiple Myeloma (MM) Patients (Pts): Final Results From The Randomized, Phase 3b, US Community-Based UPFRONT Study (NCT00507416). *Blood*. 2013;122:1966.
3. Phelps MA, Stinchcombe TE, Blachly JS, Zhao W, Schaaf LJ, Starrett SL, et al. Erlotinib in African Americans with advanced non-small cell lung cancer: a prospective randomized study with genetic and pharmacokinetic analyses. *Clin Pharmacol Ther*. 2014;96:182.
4. Stephenson JJ, Nemunaitis J, Joy AA, Martin JC, Jou YM, Zhang D, et al. Randomized phase 2 study of the cyclin-dependent kinase inhibitor dinaciclib (MK-7965) versus erlotinib in patients with non-small cell lung cancer. *Lung Cancer* 2014;83:219.
5. Benboubker L, Dimopoulos MA, Dispenzieri A, Catalano J, Belch AR, Cavo M, et al. Lenalidomide and dexamethasone in transplant-ineligible patients with myeloma. *N Engl J Med*. 2014;371:906–17.
6. Bahlis N, Corso A, Mügge LO, Shen ZX, Desjardins P, Stoppa AM, et al. Assessing the benefit of continuous treatment in the first trial (MM-020): Impact of response in patients with transplant-ineligible newly diagnosed multiple myeloma. *Haematologica*. 2015;100:85–86.
7. Dimopoulos M, Cheung M, Roussel M, Liu T, Gamberi B, Kolb B, et al. Impact of renal impairment on outcomes after treatment with lenalidomide and low-dose dexamethasone in patients with newly diagnosed multiple myeloma: First trial results. *Haematologica*. 2015;100:83–84.
8. Hulin C, Shustik C, Belch A, T. Petrucci M, Dührsen U, Lu J, et al. Effect of age on efficacy and safety outcomes in patients with newly diagnosed multiple myeloma receiving lenalidomide and low-dose dexamethasone (RD): The first trial. *Haematologica*. 2015;100:152–53.
9. Avet-Loiseau H, Hulin C, Benboubker L, Dimopoulos MA, Belch A, Reece D, et al. Impact of Cytogenetics on Outcomes of Transplant-Ineligible Patients with Newly Diagnosed Multiple Myeloma Treated with Continuous Lenalidomide Plus Low-Dose Dexamethasone in the First (MM-020) Trial. *Blood*. 2015;126:730.
10. Hulin C, Belch A, Shustik C, Petrucci MT, Dührsen U, Lu J, et al. Updated Outcomes and Impact of Age With Lenalidomide and Low-Dose Dexamethasone or Melphalan, Prednisone, and Thalidomide in the Randomized, Phase III FIRST Trial. *J Clin Oncol*. 2016;34:3609–17.
11. Lu J, Lee JH, Huang S-Y, Qiu L, Lee J-J, Liu T, et al. Continuous treatment with lenalidomide and low-dose dexamethasone in transplant-ineligible patients with newly diagnosed multiple myeloma in Asia: subanalysis of the FIRST trial. *Br J Haematol*. 2017;176:743–49.
12. Bahlis NJ, Corso A, Mügge L-O, Shen Z-X, Desjardins P, Stoppa A-M, et al. Benefit of continuous treatment for responders with newly diagnosed multiple myeloma in the randomized FIRST trial. *Leukemia*. 2017;31:2435-42.

13. Facon T, Dimopoulos MA, Dispenzieri A, Catalano JV, Belch A, Cavo M, et al. Final analysis of survival outcomes in the phase 3 FIRST trial of up-front treatment for multiple myeloma. *Blood*. 2018;131:301–10.
14. Yu H, Zhang J, Wu X, Luo Z, Wang H, Sun S, et al. A phase II randomized trial evaluating gefitinib intercalated with pemetrexed/platinum chemotherapy or pemetrexed/platinum chemotherapy alone in unselected patients with advanced non-squamous non-small cell lung cancer. *Cancer Biol Ther*. 2014;15:832.
15. Palumbo A, Bringhen S, Rossi D, Cavalli M, Larocca A, Ria R, et al. Bortezomib-melphalan-prednisone-thalidomide followed by maintenance with bortezomib-thalidomide compared with bortezomib-melphalan-prednisone for initial treatment of multiple myeloma: a randomized controlled trial. *J Clin Oncol*. 2010;28:5101–09.
16. Morabito F, Gentile M, Mazzone C, Rossi D, Di Raimondo F, Bringhen S, et al. Safety and efficacy of bortezomib-melphalan-prednisone-thalidomide followed by bortezomib-thalidomide maintenance (VMPT-VT) versus bortezomib-melphalan-prednisone (VMP) in untreated multiple myeloma patients with renal impairment. *Blood*. 2011;118:5759–66.
17. Ruggeri M, Caltagirone SA, Aschero S, Bringhen S, Saraci E, Muccio VE, et al. Chromosome 1 abnormalities and surface CD19 expression predict poor overall survival in elderly newly diagnosed multiple myeloma (MM) patients, enrolled in the gimema-mm-03-05 randomized controlled trial. *Haematologica*. 2012;97:122–23.
18. Palumbo A, Bringhen S, Rossi D, Cavalli M, Ria R, Gentilini S, et al. Overall Survival Benefit for Bortezomib-Melphalan-Prednisone-Thalidomide Followed by Maintenance with Bortezomib-Thalidomide (VMPT-VT) Versus Bortezomib-Melphalan-Prednisone (VMP) in Newly Diagnosed Multiple Myeloma Patients. *Blood*. 2015;120:200.
19. Palumbo A, Bringhen S, Larocca A, Rossi D, Di Raimondo F, Magarotto V, et al. Bortezomib-melphalan-prednisone-thalidomide followed by maintenance with bortezomib-thalidomide compared with bortezomib-melphalan-prednisone for initial treatment of multiple myeloma: updated follow-up and improved survival. *J Clin Oncol*. 2014;32:634–40.
20. Caltagirone S, Ruggeri M, Aschero S, Gilestro M, Oddolo D, Gay F, et al. Chromosome 1 abnormalities in elderly patients with newly diagnosed multiple myeloma treated with novel therapies. *Haematologica*. 2014;99:1611–17.
21. Bringhen S, Larocca A, Rossi D, Cavalli M, Genuardi M, Ria R, et al. Efficacy and safety of once-weekly bortezomib in multiple myeloma patients. *Blood*. 2010;116:4745–53.
22. San Miguel J, Bladé J, Samoiloova O, Shpilberg O, Grosicki S, Maloisel F, et al. Randomized, open-label, phase 2 study of siltuximab (an anti-il-6 mab) and bortezomib-melphalan-prednisone versus bortezomib-melphalan-prednisone in patients with previously untreated multiple myeloma. *Haematologica*. 2013;98:97.
23. San-Miguel J, Bladé J, Shpilberg O, Grosicki S, Maloisel F, Min C-K, et al. Phase 2 randomized study of bortezomib-melphalan-prednisone with or without siltuximab (anti-IL-6) in multiple myeloma. *Blood*. 2014;123:4136–42.
24. San Miguel JF, Schlag R, Khuageva NK, Dimopoulos MA, Shpilberg O, Kropff M, et al. Bortezomib plus melphalan and prednisone for initial treatment of multiple myeloma. *N Engl J Med*. 2008;359:906–17.
25. Dimopoulos MA, Richardson PG, Schlag R, Khuageva NK, Shpilberg O, Kastiris E, et al. VMP (Bortezomib, Melphalan, and Prednisone) is active and well tolerated in newly diagnosed patients with multiple myeloma with moderately impaired renal function, and results in reversal of renal impairment: Cohort analysis of the phase III VISTA study. *J Clin Oncol*. 2009;27:6086–93.

26. Mateos M-V, Richardson PG, Schlag R, Khuageva NK, Dimopoulos MA, Shpilberg O, et al. Bortezomib plus melphalan and prednisone compared with melphalan and prednisone in previously untreated multiple myeloma: Updated follow-up and impact of subsequent therapy in the phase III VISTA trial. *J Clin Oncol*. 2010;28:2259–66.
27. Richardson P, Schlag R, Khuageva N, Dimopoulos M, Shpilberg O, Kropff M, et al. Characterization of haematological parameters with bortezomib-melphalan-prednisone versus melphalan-prednisone in newly diagnosed myeloma, with evaluation of long-term outcomes and risk of thromboembolic events with use of erythropoiesis-stimulating agents: Analysis of the VISTA trial. *Br J Haematol*. 2011;153:212–21.
28. Harousseau J-L, Attal M, Avet-Loiseau H, Marit G, Caillot D, Mohty M, et al. Bortezomib plus dexamethasone is superior to vincristine plus doxorubicin plus dexamethasone as induction treatment prior to autologous stem-cell transplantation in newly diagnosed multiple myeloma: Results of the IFM 2005-01 phase III trial. *J Clin Oncol*. 2010;28:4621–29.
29. San Miguel JF, Schlag R, Khuageva NK, Dimopoulos MA, Shpilberg O, Kropff M, et al. Persistent overall survival benefit and no increased risk of second malignancies with bortezomib-melphalan-prednisone versus melphalan-prednisone in patients with previously untreated multiple myeloma. *J Clin Oncol*. 2013;31:448–55.
30. Mateos M-V, Oriol A, Martínez-López J, Gutiérrez N, Teruel A-I, Paz Rd, et al. Bortezomib, melphalan, and prednisone versus bortezomib, thalidomide, and prednisone as induction therapy followed by maintenance treatment with bortezomib and thalidomide versus bortezomib and prednisone in elderly patients with untreated multiple myeloma: A randomised trial. *Lancet Oncol*. 2010;11:934–41.
31. Mateos M-V, Oriol A, Martínez-López J, Gutiérrez N, Teruel A-I, La López de Guía A, et al. Maintenance therapy with bortezomib plus thalidomide or bortezomib plus prednisone in elderly multiple myeloma patients included in the GEM2005MAS65 trial. *Blood*. 2012;120:2581–88.
32. Mateos MV, Oriol A, Martínez-López J, Teruel AI, López de la Guía A, Blanchard MJ, et al. Do we still need the alkylators as part of the upfront treatment of elderly newly diagnosed multiple myeloma patients? Updated follow-up of GEM2005MAS65 Spanish trial comparing VMP vs VTP as induction. *Haematologica*. 2014;99:221.
33. Palumbo A, Hajek R, Delforge M, Kropff M, Petrucci MT, Catalano J, et al. Continuous lenalidomide treatment for newly diagnosed multiple myeloma. *N Engl J Med*. 2012;366:1759–69.
34. Delforge M, Dimopoulos M, Adam Z, Hajek R, Yu Z, Herbein L, et al. Safety profile and management in MM-015 comparing lenalidomide-melphalan-prednisone followed by lenalidomide maintenance (MPR-R) with MP and MPR in newly diagnosed multiple myeloma (NDMM). *Haematologica*. 2012;97:120–21.
35. Palumbo A, Hajek R, Kropff M, Petrucci MT, Catalano J, Delforge M, et al. Continuous lenalidomide treatment for transplant-ineligible newly diagnosed multiple myeloma: Update on patients aged 65-75 years enrolled in MM-015. *Haematologica*. 2012;97:341–42.
36. Cavo M, Dimopoulos M, Palumbo A, Weisel K, Delforge M, Bladé J, et al. Impact of renal impairment on the efficacy and safety of melphalan-prednisone-lenalidomide (LEN) induction followed by LEN maintenance in newly diagnosed multiple myeloma: MM-015 post-hoc analysis. *Haematologica*. 2012;97:330–31.
37. Paz-Ares L, Hirsh V, Zhang L, de Marinis F, Yang JC, Wakelee HA, et al. Monotherapy Administration of Sorafenib in Patients With Non-Small Cell Lung Cancer (MISSION) Trial: a Phase III, Multicenter, Placebo-Controlled Trial of Sorafenib in Patients with Relapsed or Refractory

Predominantly Nonsquamous Non-Small-Cell Lung Cancer after 2 or 3 Previous Treatment Regimens. *J Thorac Oncol.* 2015;10:1745.

38. Satouchi M, Nosaki K, Takahashi T, Nakagawa K, Aoe K, Kurata T, et al. First-line pembrolizumab vs chemotherapy in metastatic non-small-cell lung cancer: KEYNOTE-024 Japan subset. *Cancer Sci.* 2020;111:4480.
39. Sacchi S, Marcheselli R, Lazzaro A, Morabito F, Fragasso A, Di Renzo N, et al. A randomized trial with melphalan and prednisone versus melphalan and prednisone plus thalidomide in newly diagnosed multiple myeloma patients not eligible for autologous stem cell transplant. *Leuk Lymphoma.* 2011;52:1942–48.
40. Morgan GJ, Davies FE, Gregory WM, Russell NH, Bell SE, Szubert AJ, et al. Cyclophosphamide, thalidomide, and dexamethasone (CTD) as initial therapy for patients with multiple myeloma unsuitable for autologous transplantation. *Blood.* 2011;118:1231–38.
41. Beksac M, Haznedar R, Firatli-Tuglular T, Ozdogu H, Aydogdu I, Konuk N, et al. Addition of thalidomide to oral melphalan/prednisone in patients with multiple myeloma not eligible for transplantation: Results of a randomized trial from the Turkish Myeloma Study Group. *European journal of haematology.* 2011;86:16–22.
42. Wijermans P, Schaafsma M, Termorshuizen F, Ammerlaan R, Wittebol S, Sinnige H, et al. Phase III study of the value of thalidomide added to melphalan plus prednisone in elderly patients with newly diagnosed multiple myeloma: The HOVON 49 Study. *J Clin Oncol.* 2010;28:3160–66.
43. Waage A, Gimsing P, Fayers P, Abildgaard N, Ahlberg L, Björkstrand B, et al. Melphalan and prednisone plus thalidomide or placebo in elderly patients with multiple myeloma. *Blood.* 2010;116:1405–12.
44. Hulin C, Facon T, Rodon P, Pegourie B, Benboubker L, Doyen C, et al. Efficacy of melphalan and prednisone plus thalidomide in patients older than 75 years with newly diagnosed multiple myeloma: IFM 01/01 trial. *J Clin Oncol.* 2009;27:3664–70.
45. Palumbo A, Bringhen S, Caravita T, Merla E, Capparella V, Callea V, et al. Oral melphalan and prednisone chemotherapy plus thalidomide compared with melphalan and prednisone alone in elderly patients with multiple myeloma: randomised controlled trial. *Lancet* 2006;367:825–31.
46. Palumbo A, Bringhen S, Liberati AM, Caravita T, Falcone A, Callea V, et al. Oral melphalan, prednisone, and thalidomide in elderly patients with multiple myeloma: Updated results of a randomized controlled trial. *Blood.* 2008;112:3107–14.
47. Ludwig H, Spicka I, Kliner P, Greil R, Adam Z, Gisslinger H, et al. Continuous prednisolone versus conventional prednisolone with VMCP-interferon-alpha2b as first-line chemotherapy in elderly patients with multiple myeloma. *Br J Haematol.* 2005;131:329–37.
48. Zweegman S, van der Holt B, Mellqvist U-H, Salomo M, Bos GMJ, Levin M-D, et al. Randomized phase III trial in non-transplant eligible patients with newly diagnosed symptomatic multiple myeloma comparing melphalan-prednisone-thalidomide followed by thalidomide maintenance (MPT-T) versus melphalan-prednisone-lenalidomide followed by maintenance with lenalidomide (MPR-R): A joint study of the dutch-belgian cooperative trial group for hematology oncology (HOVON) and the nordic myeloma study group (NMSG). *Blood.* 2014;124:179.
49. Zweegman S, van der Holt B, Mellqvist U-H, Salomo M, Bos GMJ, Levin M-D, et al. Melphalan, prednisone, and lenalidomide versus melphalan, prednisone, and thalidomide in untreated multiple myeloma. *Blood.* 2016;127:1109–16.
50. Wester R, Duin M, Lam KH, Couto S, Ren Y, Wang M, et al. Higher Expression of Nuclear Cereblon in Bone Marrow Biopsies of Patients with Multiple Myeloma Treated with Imids in the



HOVON-87/Nmsg-18 Trial Is Associated with Longer PFS and OS. Presented at American Society of Hematology Washington, DC; 2019.

51. Facon T, Mary J-Y, Pégourie B, Attal M, Renaud M, Sadoun A, et al. Dexamethasone-based regimens versus melphalan-prednisone for elderly multiple myeloma patients ineligible for high-dose therapy. *Blood*. 2006;107:1292–98.
52. Gay F, Bringhen S, Offidani M, Liberati A, Cellini C, Magarotto V, et al. Efficacy and safety of 3 lenalidomide-based combinations in elderly newly diagnosed multiple myeloma patients: Results from the phase 3 community based emn01 trial. *Haematologica*. 2013;98:95–96.
53. Palumbo A, Magarotto V, Bringhen S, Offidani M, Pietrantonio G, Liberati AM, et al. A randomized phase 3 trial of melphalan-lenalidomide-prednisone (MPR) or cyclophosphamide-prednisone-lenalidomide (CPR) vs lenalidomide plus dexamethasone (Rd) in elderly newly diagnosed multiple myeloma patients. *Blood*. 2013;122:536.
54. Magarotto V, Bringhen S, Offidani M, Liberati AM, Benevolo G, Patriarca F, et al. Lenalidomide plus dexamethasone (RD) vs melphalan-lenalidomide-prednisone (MPR) or cyclophosphamide-prednisone-lenalidomide (CPR) in elderly community-based newly diagnosed multiple myeloma patients: Efficacy and safety results from a phase 3 trial. *Haematologica*. 2013;98:50.
55. Magarotto V, Bringhen S, Offidani M, Benevolo G, Patriarca F, Mina R, et al. Triplet vs doublet lenalidomide-containing regimens for the treatment of elderly patients with newly diagnosed multiple myeloma. *Blood*. 2016;127:1102–08.
56. Halmos B PN, Fu P, Saad S, Gadgeel S, Otterson GA, Mekhail T, Snell M, Kuebler JP, Sharma N, Dowlati A. Randomized Phase II Trial of Erlotinib Beyond Progression in Advanced Erlotinib-Responsive Non-Small Cell Lung Cancer. *Oncologist*. 2015;20:1298.
57. Bringhen S, D’Agostino M, Paris L, Ballanti S, Pescosta N, Spada S, et al. Lenalidomide-based induction and maintenance in elderly newly diagnosed multiple myeloma patients: Updated results of the EMN01 randomized trial. *Haematologica*. 2020;105:1937.
58. Hungria VTM, Crusoé EQ, Maiolino A, Bittencourt R, Fantl D, Maciel JFR, et al. Phase 3 trial of three thalidomide-containing regimens in patients with newly diagnosed multiple myeloma not transplant-eligible. *Ann Hematol*. 2016;95:271–78.
59. Mateos M-V, Gutierrez NC, Martín M-L, Martínez-López J, Hernandez MT, Martinez R, et al. Bortezomib Plus Melphalan and Prednisone (VMP) Followed By Lenalidomide and Dexamethasone (Rd) in Newly Diagnosed Elderly Myeloma Patients Overcome the Poor Prognosis of High-Risk Cytogenetic Abnormalities (CA) Detected By Fluorescence in Situ Hybridization (FISH). *Blood*. 2015;126:4243.
60. Mateos M-V, Martínez-López J, Hernández M-T, Ocio E-M, Rosiñol L, Martínez R, et al. Sequential vs alternating administration of VMP and Rd in elderly patients with newly diagnosed MM. *Blood*. 2016;127:420–25.
61. Stewart AK, Jacobus S, Fonseca R, Weiss M, Callander NS, Chanan-Khan AA, et al. E1A06: A phase III trial comparing melphalan, prednisone, and thalidomide (MPT) versus melphalan, prednisone, and lenalidomide (MPR) in newly diagnosed multiple myeloma (MM). *Haematologica*. 2014;99:220.
62. Stewart AK, Jacobus S, Fonseca R, Weiss M, Callander NS, Chanan-Khan AA, et al. Melphalan, prednisone, and thalidomide vs melphalan, prednisone, and lenalidomide (ECOG E1A06) in untreated multiple myeloma. *Blood*. 2015;126:1294–301.

63. Song M-K, Chung J-S, Shin H-J, Moon J-H, Lee J-J, Yoon S-S, et al. Cyclophosphamide-containing regimen (TCD) is superior to melphalan-containing regimen (MPT) in elderly multiple myeloma patients with renal impairment. *Ann Hematol.* 2012;91:889–96.
64. Ludwig H, Hajek R, Tóthová E, Drach J, Adam Z, Labar B, et al. Thalidomide-dexamethasone compared with melphalan-prednisolone in elderly patients with multiple myeloma. *Blood.* 2009;113:3435–42.
65. Facon T, Mary JY, Hulin C, Benboubker L, Attal M, Pegourie B, et al. Melphalan and prednisone plus thalidomide versus melphalan and prednisone alone or reduced-intensity autologous stem cell transplantation in elderly patients with multiple myeloma (IFM 99-06): A randomised trial. *Lancet* 2007;370:1209–18.
66. Dimopoulos MA, Grosicki S, Jędrzejczak WW, Nahi H, Gruber A, Hansson M, et al. Randomized Phase 2 Study of the All-Oral Combination of Investigational Proteasome Inhibitor (PI) Ixazomib Plus Cyclophosphamide and Low-Dose Dexamethasone (ICd) in Patients (Pts) with Newly Diagnosed Multiple Myeloma (NDMM) Who Are Transplant-Ineligible (NCT02046070). *Blood.* 2015;126:26.
67. Kazandjian D, Suzman DL, Blumenthal G, Mushti S, He K, Libeg M, et al. FDA Approval Summary: nivolumab for the Treatment of Metastatic Non-Small Cell Lung Cancer With Progression On or After Platinum-Based Chemotherapy. *Oncologist.* 2016;21:634.
68. Reck M, Mok TSK, Nishio M, Jotte RM, Cappuzzo F, Orlandi F, et al. Atezolizumab plus bevacizumab and chemotherapy in non-small-cell lung cancer (IMpower150): key subgroup analyses of patients with EGFR mutations or baseline liver metastases in a randomised, open-label phase 3 trial. *Lancet Respir Med.* 2019;7:387.
69. Dimopoulos MA, Grosicki S, Jędrzejczak WW, Nahi H, Gruber A, Hansson M, et al. All-oral ixazomib, cyclophosphamide, and dexamethasone for transplant-ineligible patients with newly diagnosed multiple myeloma. *Eur J Cancer.* 2019;106:89–98.
70. Kozuki T, Nogami N, Hataji O, Tsunozuka Y, Seki N, Harada T, et al. Open-label, multicenter, randomized phase II study on docetaxel plus bevacizumab or pemetrexed plus bevacizumab for treatment of elderly (aged  $\geq 75$  years) patients with previously untreated advanced non-squamous non-small cell lung cancer: TORG1323. *Transl Lung Cancer Res.* 2020;9:459.
71. Kubo K, Hori M, Ohta K, Handa H, Hatake K, Matsumoto M, et al. Elotuzumab plus lenalidomide and dexamethasone for newly diagnosed multiple myeloma: a randomized, open-label, phase 2 study in Japan. *Int J Hematol.* 2020;111:65-74.
72. Facon T, Lee JH, Moreau P, Niesvizky R, Dimopoulos M, Hajek R, et al. Carfilzomib or bortezomib with melphalan-prednisone for transplant-ineligible patients with newly diagnosed multiple myeloma. *Blood.* 2019;133:1953–63.
73. Xing L, Wu G, Wang L, Li J, Wang J, Yuan Z, et al. Erlotinib vs etoposide/cisplatin with radiotherapy in unresectable stage III epidermal growth factor receptor mutation-positive non-small-cell lung cancer: a multicenter, randomized, open-label, phase 2 trial. *Int J Radiat Oncol Biol Phys.* 2020;
74. Usmani SZ, Schjesvold F, Oriol A, Karlin L, Cavo M, Rifkin RM, et al. Pembrolizumab plus lenalidomide and dexamethasone for patients with treatment-naive multiple myeloma (KEYNOTE-185): A randomised, open-label, phase 3 trial. *Lancet Haematol.* 2019;6:8448-e458.
75. Genova C RGPVAVGREBFBGTMDMBGSCSAA. Gefitinib plus vinorelbine in advanced non-small cell lung cancer (NSCLC) harboring mutations of the epidermal growth factor receptor (EGFR). *Tumori.* 2019;105:85.

76. Mateos M-V, Dimopoulos MA, Cavo M, Suzuki K, Jakubowiak A, Knop S, et al. Daratumumab plus Bortezomib, Melphalan, and Prednisone for Untreated Myeloma. *N Engl J Med*. 2018;378:518–28.
77. Zhou M, Chen X, Zhang H, Xia L, Tong X, Zou L, et al. China National Medical Products Administration approval summary: anlotinib for the treatment of advanced non-small cell lung cancer after two lines of chemotherapy. *Cancer Commun*. 2019;39:36.
78. Kato T, Yoshioka H, Okamoto I, Yokoyama A, Hida T, Seto T, et al. Afatinib versus cisplatin plus pemetrexed in Japanese patients with advanced non-small cell lung cancer harboring activating EGFR mutations: subgroup analysis of LUX-Lung 3. *Cancer Sci*. 2015;106:1202.
79. van den Heuvel MM, Uytendinck W, Vincent AD, de Jong J, Aerts J, Koppe F, et al. Additional weekly Cetuximab to concurrent chemoradiotherapy in locally advanced non-small cell lung carcinoma: efficacy and safety outcomes of a randomized, multi-center phase II study investigating. *Radiother Oncol*. 2014;110:126.
80. Mateos M-V, Cavo M, Bladé J, Dimopoulos MA, Suzuki K, Jakubowiak A, et al. Daratumumab plus bortezomib, melphalan, and prednisone versus bortezomib, melphalan, and prednisone in patients with transplant-ineligible newly diagnosed multiple myeloma: overall survival in alcyone. Presented at American Society of Hematology Washington, DC; 2019.
81. Mateos M-V, Cavo M, Blade J, Dimopoulos MA, Suzuki K, Jakubowiak A, et al. Overall survival with daratumumab, bortezomib, melphalan, and prednisone in newly diagnosed multiple myeloma (ALCYONE): a randomised, open-label, phase 3 trial. *Lancet*. 2020;395:132-41.
82. Fujisaki T, Ishikawa T, Takamatsu H, Suzuki K, Min C-K, Lee JH, et al. Daratumumab plus bortezomib, melphalan, and prednisone in East Asian patients with non-transplant multiple myeloma: subanalysis of the randomized phase 3 ALCYONE trial. *Ann Hematol*. 2019;98:2805-14.
83. Pai-Scherf L, Blumenthal GM, Li H, Subramaniam S, Mishra-Kalyani PS, He K, et al. FDA Approval Summary: pembrolizumab for Treatment of Metastatic Non-Small Cell Lung Cancer: first-Line Therapy and Beyond. *Oncologist*. 2017;22:1392.
84. Facon T, Kumar S, Plesner T, Orłowski RZ, Moreau P, Bahlis N, et al. Daratumumab plus Lenalidomide and Dexamethasone for Untreated Myeloma. *The New England journal of medicine*. 2019;380:2104–15.
85. Machiels JP LL, Haddad RI, Tahara M, Cohen EE. Rationale and design of LUX-Head & Neck 1: a randomised, Phase III trial of afatinib versus methotrexate in patients with recurrent and/or metastatic head and neck squamous cell carcinoma who progressed after platinum-based therapy. *BMC Cancer*. 2014;14:473.
86. Kawaguchi T, Ando M, Asami K, Okano Y, Fukuda M, Nakagawa H, et al. Randomized phase III trial of erlotinib versus docetaxel as second- or third-line therapy in patients with advanced non-small-cell lung cancer: docetaxel and Erlotinib Lung Cancer Trial (DELTA). *J Clin Oncol*. 2014;32:1902.
87. Bahlis N, Facon T, Usmani SZ, Kumar SK, Plesner T, Orłowski RZ, et al. Daratumumab plus lenalidomide and dexamethasone (D-Rd) versus lenalidomide and dexamethasone (Rd) in patients with newly diagnosed multiple myeloma (NDMM) ineligible for transplant: updated analysis of Maia. Presented at American Society of Hematology Washington, DC; 2019.
88. Kabbinnar F, Fehrenbacher L, Hainsworth J, Kasubhai S, Kressel B, Marsland T, et al. Biomarker analyses from a randomized, placebo-controlled, phase IIIb trial comparing bevacizumab with or without erlotinib as maintenance therapy for the treatment of advanced non-small-cell lung cancer (ATLAS). *J Thorac Oncol*. 2014;9:1411.

89. Yang JC, Kang JH, Mok T, Ahn MJ, Srimuninnimit V, Lin CC, et al. First-line pemetrexed plus cisplatin followed by gefitinib maintenance therapy versus gefitinib monotherapy in East Asian patients with locally advanced or metastatic non-squamous non-small cell lung cancer: a randomised, phase 3 trial. *Eur J Cancer*. 2014;50:2219.
90. Larocca A, Salvini M, Gaidano G, Cascavilla N, Benevolo G, Galli M, et al. TREATMENT WITH DOSE/SCHEDULE-ADJUSTED RD-R vs CONTINUOUS RD IN ELDERLY INTERMEDIATE-FIT NEWLY DIAGNOSED MULTIPLE MYELOMA PATIENTS: RESULTS OF RV-MM-PI-0752 PHASE III RANDOMIZED STUDY. *Haematologica*. 2019;104:10-10.
91. Heigener DF, Deppermann KM, Pawel JV, Fischer JR, Kortsik C, Bohnet S, et al. Open, randomized, multi-center phase II study comparing efficacy and tolerability of Erlotinib vs. Carboplatin/Vinorelbine in elderly patients (>70 years of age) with untreated non-small cell lung cancer. *Lung Cancer* 2014;84:62.
92. Durie BG, Hoering A, Sexton R, Abidi MH, Epstein J, Rajkumar SV, et al. Longer term follow-up of the randomized phase III trial SWOG S0777: bortezomib, lenalidomide and dexamethasone vs. lenalidomide and dexamethasone in patients (Pts) with previously untreated multiple myeloma without an intent for immediate autologous stem cell transplant (ASCT). *Blood Cancer J*. 2020;10:1-11.
93. Jackson GH, Davies FE, Pawlyn C, Cairns DA, Striha A, Collett C, et al. Lenalidomide maintenance versus observation for patients with newly diagnosed multiple myeloma (Myeloma XI): A multicentre, open-label, randomised, phase 3 trial. *Lancet Oncol*. 2019;20:57–73.
94. Ellis PM, Shepherd FA, Millward M, Perrone F, Seymour L, Liu G, et al. Dacomitinib compared with placebo in pretreated patients with advanced or metastatic non-small-cell lung cancer (NCIC CTG BR.26): a double-blind, randomised, phase 3 trial. *Lancet Oncol*. 2014;15:1379.
95. Jackson GH, Davies FE, Pawlyn C, Cairns DA, Striha A, Collett C, et al. Response-adapted intensification with cyclophosphamide, bortezomib, and dexamethasone versus no intensification in patients with newly diagnosed multiple myeloma (Myeloma XI): a multicentre, open-label, randomised, phase 3 trial. *Lancet Haematol*. 2019;6:e616-e29.
96. Jackson GH, Pawlyn C, Cairns DA, Striha A, Collett C, Waterhouse A, et al. Optimising the value of immunomodulatory drugs during induction and maintenance in transplant ineligible patients with newly diagnosed multiple myeloma: results from Myeloma XI, a multicentre, open-label, randomised, Phase III trial. *Br J Haematol*. 2021;192:853-68.
97. Suzuki K, Doki N, Meguro K, Sunami K, Kosugi H, Sasaki O, et al. Report of phase I and II trials of melphalan, prednisolone, and thalidomide triplet combination therapy versus melphalan and prednisolone doublet combination therapy in Japanese patients with newly diagnosed multiple myeloma ineligible for autologous stem cell transplantation. *Int J Hematol*. 2019;110:447-57.
98. Brioli A, Manz K, Pfirrmann M, Hänel M, Schwarzer AC, Prange-Krex G, et al. Frailty impairs the feasibility of induction therapy but not of maintenance therapy in elderly myeloma patients: final results of the German Maintenance Study (GERMAIN). *J Cancer Res Clin Oncol*. 2020;146:749-59.
99. Ludwig H, Sormann S, Zojer N, Andel J, Hartmann B, Tinchon C, et al. CARFILZOMIB IN COMBINATION WITH EITHER RD OR TD OVERCOMES THE NEGATIVE IMPACT OF HR CYTOGENETICS IN NDMM. INTERIM EFFICACY ANALYSIS OF COMBINED DATA OF KRD VS KTD FOLLOWED BY K MAINTENANCE OR CONTROL. Presented at European Hematology Association 2020.
100. Kumar SK, Jacobus SJ, Cohen AD, Weiss M, Callander N, Singh AK, et al. Carfilzomib or bortezomib in combination with lenalidomide and dexamethasone for patients with newly

- diagnosed multiple myeloma without intention for immediate autologous stem-cell transplantation (ENDURANCE): a multicentre, open-label, phase 3, randomised, controlled trial. *Lancet Oncol.* 2020;21:1317-30.
101. Puig N, Hernández MT, Rosinol Dachs L, Garcia EG, De Arriba F, Oriol A, et al. Randomized trial of lenalidomide and dexamethasone versus clarythromycin, lenalidomide and dexamethasone as first line treatment in patients with multiple myeloma not candidates for autologous stem cell transplantation: results of the GEM-Claridex clinical trial. Presented at American Society of Hematology Washington, DC; 2019.
  102. Puig N, Hernández MT, Rosiñol L, González E, de Arriba F, Oriol A, et al. LENALIDOMIDE AND DEXAMETHASONE PLUS OR MINUS CLARYTHROMYCIN IN NEWLY DIAGNOSED MULTIPLE MYELOMA PATIENTS INELIGIBLE FOR AUTOLOGOUS STEM CELL TRANSPLANTATION: UPDATED RESULTS OF THE GEM-CLARIDEX TRIAL. Presented at European Hematology Association 2020.
  103. Larocca A, Corradini P, Mina R, Cascavilla N, Liberati AM, Pescosta N, et al. Efficacy and Safety of Ixazomib-Dexamethasone, Ixazomib-Cyclophosphamide-Dexamethasone, Ixazomib-Thalidomide-Dexamethasone and Ixazomib-Bendamustine-Dexamethasone for Elderly Newly Diagnosed Multiple Myeloma (NDMM) Patients: Analysis of the Phase II Randomized Unito-EMN10 Study. Presented at American Society of Hematology Washington, DC; 2019.
  104. Mina R, Larocca A, Corradini P, Cascavilla N, Liberati AM, Pescosta N, et al. IXAZOMIB WITH EITHER DEXAMETHASONE, CYCLOPHOSPHAMIDE-DEXAMETHASONE, THALIDOMIDE-DEXAMETHASONE OR BENDAMUSTINE-DEXAMETHASONE FOLLOWED BY IXAZOMIB MAINTENANCE IN ELDERLY NEWLY DIAGNOSED MYELOMA PATIENTS. Presented at European Hematology Association 2020.
  105. Белоусов K, Mitina T, Golenkov A, Kataeva E, Trifonova E, Chernih Y, et al. EXPERIENCE WITH THE USE OF ANTITUMOR PROGRAMS OF VMP (BORTEZOMIB, MELPHALANE, PREDNISOLONE) AND RVP (LENALIDOMIDE, BORTEZOMIB, PREDNISOLONE) IN PATIENTS WITH NEWLY DIAGNOSED MULTIPLE MYELOMA. Presented at European Hematology Association 2020.
  106. Ludwig H, Sormann S, Zojer N, Andel J, Hartmann BL, Tinchon C, et al. Carfilzomib-Revlimid-Dexamethasone Vs. Carfilzomib-Thalidomide-Dexamethasone Weekly (After 2 Twice Weekly Cycles) Followed By Carfilzomib Maintenance Vs. Control in Transplant Non-Eligible Patients with Newly Diagnosed Multiple Myeloma (NDMM)-Interim Efficacy Analysis of Combined Data (AGMT MM-02). Presented at American Society of Hematology Washington, DC; 2019.
  107. Facon T, Venner C, Bahlis N, Offner F, White D, Benboubker L, et al. The phase 3 TOURMALINE-MM2 trial: oral ixazomib, lenalidomide, and dexamethasone (IRd) vs placebo-Rd for transplant-ineligible patients with newly diagnosed multiple myeloma (NDMM). *Blood.* 2021;137:3616-28.
  108. Zweegman S, Stege CA, Haukas E, Schjesvold FH, Levin M-D, Waage A, et al. Ixazomib-thalidomide-low dose dexamethasone induction followed by maintenance therapy with ixazomib or placebo in newly diagnosed multiple myeloma patients not eligible for autologous stem cell transplantation; results from the randomized phase II HOVON-126/NMSG 21.13 trial. *Haematologica.* 2020;105:
  109. Usmani SZ, Hoering A, Ailawadhi S, Sexton R, Lipe B, Hita SF, et al. Bortezomib, lenalidomide, and dexamethasone with or without elotuzumab in patients with untreated, high-risk multiple myeloma (SWOG-1211): primary analysis of a randomised, phase 2 trial. *Lancet Haematol.* 2021;8:e45-e54.
  110. Dimopoulos MA, Špička I, Quach H, Oriol A, Hájek R, Garg M, et al. Ixazomib as postinduction maintenance for patients with newly diagnosed multiple myeloma not undergoing

autologous stem cell transplantation: the phase III TOURMALINE-MM4 trial. *J Clin Oncol.* 2020;38:4030-41.
